# Supplementary material for: Whole-Exome Sequencing Identified a Novel Compound Heterozygous Mutation of LRRC6 in a Chinese Primary Ciliary Dyskinesia Patient
Source: Hindawi journal article supplement (doi:10.1155/2018/1854269), 2018-01-01
Supplement: f1 [file 1854269.f1.pdf]

Table S1. The gene list of PCD-related gene.

| Gene Name |         |         |          |        |         |        |         |
|-----------|---------|---------|----------|--------|---------|--------|---------|
| DNAH5     | CCDC114 | DNAAF2  | DYX1C1   | RSPH3  | CCDC164 | MCIDAS | DNAH6   |
| DNAI1     | ARMC4   | DNAAF3  | SPAG1    | RSPH4A | CCDC65  | OFD1   | PIH1D3  |
| DNAI2     | CCDC151 | HEATR2  | CCDC103  | RSPH9  | DNAH11  | RPGR   | DNAJB13 |
| DNAL1     | TTC25   | LRRC6   | C21orf59 | CCDC39 | HYDIN   | DNAH8  | SKT36   |
| NME8      | DNAAF1  | ZMYND10 | RSPH1    | CCDC40 | CCNO    | GAS8   | PRH1D3  |
